# Supplementary material for: Chlorin e6 loaded lactoferrin nanoparticles for enhanced photodynamic therapy
Source: Royal Society of Chemistry journal article supplement (doi:10.1039/c7tb02599h), 2017-01-01
Supplement: c7tb02599h1.pdf [file c7tb02599h1.pdf]

## Supplementary Information

### Chlorin e6 loaded lactoferrin nanoparticles for enhanced photodynamic therapy

Mahesh G Adimoolam<sup>a,c</sup>, Vijayalakshmi A<sup>b</sup>, Madhusudhana Rao Nalam<sup>b,\*</sup> and Manorama V Sunkara<sup>a,\*</sup>

a. CSIR- Indian Institute of Chemical Technology, Uppal Road, Hyderabad, India

b. CSIR- Centre For Cellular and Molecular Biology, Uppal Road, Hyderabad, India

c. AcSIR- Academy of Scientific and Innovative Research, India

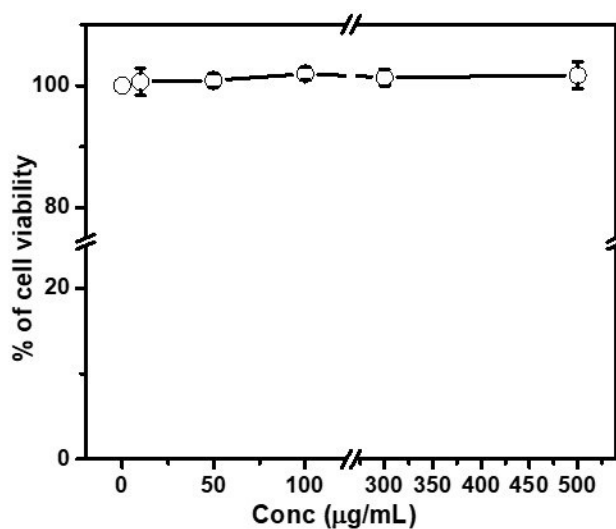

**Fig.S1:** Cell death of SK-OV-3 cells in the presence of Lactoferrin nanoparticles (without Ce6) and upon light treatment. Cell viability was estimated by MTT assay after light treatment.
